# Supplementary material for: ZnO nanorod/porous silicon nanowire hybrid structures as highly-sensitive NO2 gas sensors at room temperature
Source: Royal Society of Chemistry journal article supplement (doi:10.1039/c5cp07036h), 2016-01-01
Supplement: c5cp07036h1.pdf [file c5cp07036h1.pdf]

**Table S1 humidity data during the gas sensing test**

| Gas                  | Dry air | 5 ppm<br>NO <sub>2</sub> | 10 ppm<br>NO <sub>2</sub> | 20 ppm<br>NO <sub>2</sub> | 35 ppm<br>NO <sub>2</sub> | 50 ppm<br>NO <sub>2</sub> |
|----------------------|---------|--------------------------|---------------------------|---------------------------|---------------------------|---------------------------|
| Dew point (°C)       | -57.5   | -57.3                    | -57.2                     | -56.9                     | -56.5                     | -56.1                     |
| Relative humidity(%) | 0.0647  | 0.0664                   | 0.0673                    | 0.0700                    | 0.0738                    | 0.0777                    |
